# Supplementary material for: How Global Is the Global Biodiversity Information Facility?
Source: PLoS One. 2007 Nov 7;2(11):e1124. doi: 10.1371/journal.pone.0001124 (PMC2043490; doi:10.1371/journal.pone.0001124)
Supplement: Appendix S1 — List of institutions providing specimen data used in this analysis (0.03 MB XLS) [file pone.0001124.s001.xls]

## Sheet: Appendix 1
Apendix 1 - List of institutions providing specimen data used in this analysis.
Data acessed via http://www.gbif.org
GBIF data provider (herbarium code)	records	species
Alto de Zorroaga (ARAN)	2173	258
Arizona State University (ASU)	3689	201
Australian National Botanic Gardens (CBG)	10933	10925
Bernice Pauahi Bishop Museum (BISH)	151	54
Biologiezentrum, Linz-Dornach	491	143
Biologiezentrum der Oberoesterreichischen Landesmuseen-Biologiezentrum Linz	1148	58
Botanic Garden and Botanical Museum Berlin (B)	8	8
Botanical Museum, Lund (LD)	9134	308
Botanical Society of the British Isles	379252	1530
Brisbane Botanic Gardens (BRI)	1410	199
Bundesamt für Naturschutz (BNL)	88074	106
Centre for Plant Biodiversity Research, Canberra (CANB)	23307	21774
Dorset Environmental Records Centre	12	4
Environment and Heritage Service	9097	57
Fachbereich Wald und Forstwirtschaft-Süddeutsche Bergwälder	970	16
Fairchild Tropical Botanic Garden (FTG)	5	4
Herbier de la Guyane (CAY)	2865	288
Hoverfly Recording Scheme	2	2
Icelandic Institute of Natural History (ICEL)	94	13
Inatura - Dornbirn: Belegsammlung - Blütenpflanzen	9	2
Instituto Nacional de Biodiversidad (Costa Rica) (INB)	6200	374
IOP, Poland	95	33
Kartierung der Flora von Österreich und Nachbargeb	1466	4
Lothian Wildlife Information Centre	38	15
Missouri Botanic Garden (MO)	29580	3116
New York Botanical Gardens (NY)	1308	570
Ratcliffe College, Leicester, UK (LCR)	1138	18
Real Jardín Botánico (MA)	2538	460
Regionherbariet i Oskarshamn (OHN)	3522	207
Royal Botanic Gardens, New South Wales (NSW)	26453	1218
Scottish Natural Heritage	70	6
SE:ArtDatabanken	3610	80
Steiermärkisches Landesmuseum Joanneum (GJO)	1	1
The University of Reading Herbarium (RNG)	1115	317
Tiroler Landesmuseum Ferdinandeum (IBF)	217	4
Universidad Complutense (MAF)	198	113
Universidad de Alicante (ABH)	2713	298
Universidad de Almería (HUAL)	620	142
Universidad de Córdoba (COA)	351	140
Universidad de Oviedo (FCO)	450	185
Universidad de Salamanca (SALA)	1861	325
Universidad del País Vasco (BIO)	2103	266
Universitat de Girona (HGI)	1320	178
Universitat de València (VAL)	1258	289
Universität Wien (WU)	174	122
University of Aarhus (AAU)	2235	534
University of Alabama (UNA)	822	145
University of Arizona (ARIZ)	2898	367
University of Arkansas (UAM)	1456	47
University of Kansas (KANU)	630	114
University of Oxford (FHO)	361	62
University of Turku (TUR)	716	9
Utah State University (USU-UTC)	436	175
WWF Peru	94	59

## Sheet: Appendix 2
Appendix 2 - GBIF Legume data per TDWG level 4 area.
Coverage is the proportion of species with known distribution from ILDIS present in GBIF data
TDWG level 4 name	country	GBIF records	GBIF species	ILDIS species	% coverage
Sweden	Sweden	5897	69	100	0.69
East Aegean Is.	Greece	1403	140	224	0.625
Great Britain	United Kingdom	319915	110	183	0.6011
Spain	Spain	12857	366	623	0.5875
Costa Rica	Costa Rica	6013	270	479	0.5637
Greece	Greece	5031	259	491	0.5275
Ecuador	Ecuador	3339	201	383	0.5248
Nicaragua	Nicaragua	2545	136	262	0.5191
New South Wales	Australia	20776	493	964	0.5114
Western Australia	Australia	11855	873	1734	0.5035
Cocos I.	Costa Rica	1	1	2	0.5
Germany	Germany	82831	87	182	0.478
Kriti	Greece	454	112	237	0.4726
Queensland	Australia	8062	536	1170	0.4581
French Guiana	French Guyana	2401	188	417	0.4508
Alaska	United States	1126	27	62	0.4355
Iceland	Iceland	76	8	19	0.4211
Tasmania	Australia	451	50	120	0.4167
Senegal	Senegal	440	123	298	0.4128
Northern Territory	Australia	6244	342	848	0.4033
Total (609 areas)		533026	5423	20014	0.27096

## Sheet: Appendix 3
Appendix 3 - GBIF data for global hotspots. Hotspot names as Mittermeier et al. (2005)
hotspot name	points (rank)	% total	species
Mediterranean Basin	18156	0.0340621	515
Mesoamerica	9714	0.0182243	595
Southwest Australia	7499	0.0140687	598
Tropical Andes	2918	0.0054744	472
Tumbes-Choco-Magdalena	1259	0.00236199	246
Madrean Pine-Oak Woodlands	1413	0.0026509	224
New Zealand	1023	0.00191923	22
Madagascar and the Indian Ocean Islands	762	0.00142957	217
Atlantic Forest	487	0.000913651	265
Eastern Afromontane	567	0.00106374	150
Cerrado	240	0.000450259	136
Guinean Forests of West Africa	303	0.000568453	117
East Melanesian Islands	104	0.000195112	118
Coastal Forests of Eastern Africa	222	0.00041649	106
Polynesia-Micronesia	87	0.000163219	67
Indo-Burma	157	0.000294545	37
Caribbean Islands	45	8.44236e-05	25
California Floristic Province	115	0.000215749	40
Sundaland	69	0.00012945	35
Wallacea	32	6.00346e-05	37
Caucasus	44	8.25476e-05	25
Irano-Anatolian	32	6.00346e-05	24
Horn of Africa	29	5.44064e-05	12
Cape Floristic Region	32	6.00346e-05	14
Chilean Winter Rainfall and Valdivian Forests	22	4.12738e-05	13
New Caledonia	11	2.06369e-05	14
Philippines	15	2.81412e-05	8
Mountains of Southwest China	11	2.06369e-05	4
Japan	5	9.38041e-06	1
Mountains of Central Asia	5	9.38041e-06	4
Western Ghats and Sri Lanka	3	5.62824e-06	2
Succulent Karoo	3	5.62824e-06	3
Maputaland-Pondoland-Albany	1	1.87608e-06	1
Himalaya	1	1.87608e-06	1
Total within a Hotspot	45386	0.0851478	3199
Outside Hotspots	487640	0.914852	3644
Total	533026	1	5423
